# Supplementary material
Source: MDPI journal article supplement (https://www.mdpi.com/2071-1050/15/2/1723)
Supplement: s1 [file s1]

**Table S1.** The explanation of relevant variables.

| Variable          | Unit | Variable        | Unit   |
|-------------------|------|-----------------|--------|
| $CIC_{t,biomass}$ | kW   | $IR_{biomass}$  | kW     |
| $NIC_{t,biomass}$ | kW   | $ICC_{biomass}$ | kW     |
| $DIC_{t,biomass}$ | kW   | $LS_{biomass}$  | kW     |
| R                 | CNY  | FIT             | CNY/kW |
| $PG_{biomass}$    | kW   | TC              | CNY    |

**Table S2.** The key variable's value.

| Variable                 | value                               | Variable                | value                                                  |
|--------------------------|-------------------------------------|-------------------------|--------------------------------------------------------|
| FIT                      | 0.75 NY/kW<br>[NEA]                 | $CIC_{initial,biomass}$ | 8.68*10 <sup>6</sup> kW<br>[China Electricity Council] |
| Carbon price             | 80 CNY/ton<br>[Zhang et al.,2022]   |                         | 0.997kg/kWh<br>[Zhang et al., 2020]                    |
| Investment cost per unit | 10470CNY/kW<br>[Zhang et al., 2016] |                         |                                                        |
